# Supplementary material for: Scaling from individual trees to forests in an Earth system modeling framework using a mathematically tractable model of height-structured competition
Source: Copernicus journal article supplement (doi:10.5194/bg-12-2655-2015), 2015-05-07
Supplement: Supplementary file 1 [file bg-12-2655-2015-supplement.zip]

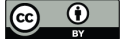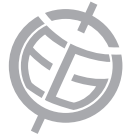

## *Supplement of*

# **Scaling from individual trees to forests in an Earth system modeling framework using a mathematically tractable model of height-structured competition**

**E. S. Weng et al.**

*Correspondence to:* E. S. Weng ([weng@princeton.edu](mailto:weng@princeton.edu))

- [bg-12-2655-2015-supplement-cover-letter.pdf](#)
- [LM3-PPA-SupplementalFigures-rev4.docx](#)
